# Supplementary material for: Tailor-made inflammation: how neutrophil serine proteases modulate the inflammatory response
Source: PubMed Central journal article supplement — J Mol Med (Berl). 2010 Aug 31;89(1):23–8. doi: 10.1007/s00109-010-0677-3 (PMC3016231; doi:10.1007/s00109-010-0677-3), 2010-08-31
Supplement: 109_2010_677_MOESM1_ESM.pdf [file 109_2010_677_MOESM1_ESM.pdf]

Journal of Molecular Medicine 2010

Supplementary material

Title:

**Tailor-made inflammation: how neutrophil serine proteases modulate the inflammatory response**

Authors:

Kai Kessenbrock<sup>1</sup>, Therese Dau<sup>2</sup>, Dieter E. Jenne

<sup>1</sup> Department of Anatomy, University of California, San Francisco, CA 94143-0452, USA

<sup>2</sup> Max-Planck-Institute of Neurobiology, Department of Neuroimmunology, Am Klopferspitz 18, 82152 Martinsried, Germany

Supplementary Table 1

|            | <b>Influence on inflammation</b> | <b>Substrate</b> | <b>Cleavage site</b>      | <b>Modification</b> | <b>Experiment</b>    | <b>References</b> |
|------------|----------------------------------|------------------|---------------------------|---------------------|----------------------|-------------------|
| <b>PR3</b> | Pro-inflammatory                 | CXCL8            | PRSA↓K <sub>8</sub> ELR   | Truncation          | In vitro, cell based | (1;2)             |
|            |                                  | Annexin          |                           | Degradation         | In vitro, cell based | (3)               |
|            |                                  | CAP18            | KRFA↓L <sub>134</sub> LGD | Activation          | Ex vivo              | (4-6)             |
|            |                                  | Il-1β            |                           | Activation          | In vitro, cell based | (7)               |
|            |                                  | Il-18            |                           | Activation          | In vitro, cell based | (8)               |
|            | Anti-inflammatory                | Il-32            | HLET↓VAAY                 | Activation          | In vitro             | (9-11)            |
|            |                                  | TNFα             | AQAV↓R <sub>78</sub> SSS  | Activation          | Ex vivo              | (12-15)           |
|            |                                  | CCL3(L1)         |                           | Degradation         | In vitro, cell based | (16)              |
|            |                                  | Chemerin         | GQFA↓F <sub>156</sub> SKA | Inactivation        | In vitro, cell based | (6;17)            |
|            |                                  | Il-6             | TTNA↓S <sub>174</sub> LLT | Inactivation        | Ex vivo              | (18)              |
| <b>NE</b>  | Pro-inflammatory                 | CCL15            | ENPV↓V <sub>22</sub> LNS  | Truncation          | Ex vivo              | (2;19)            |
|            |                                  | CCL23            | FHAT↓S <sub>30</sub> ADCC | Truncation          | Ex vivo              | (2;19)            |
|            |                                  | Chemerin         | FAFS↓K <sub>158</sub> ALP | Inactivation        | In vitro, cell based | (6;20;21)         |
|            |                                  | Granulin         |                           | Degradation         | In vitro             | (2;22)            |
|            | Anti-inflammatory                | CXCL7            |                           | Degradation         | In vitro             | (2;23)            |
|            |                                  | CXCL8            |                           | Degradation         | In vitro             | (2;24)            |
|            |                                  | CXCL12           |                           | Degradation         | In vitro, cell based | (25)              |
|            |                                  | CCL3(L1)         |                           | Degradation         | In vitro, cell based | (2;16)            |
|            |                                  | CAP18            |                           | Degradation         | In vitro             | (4)               |
|            |                                  | TNFα             |                           | Degradation         | In vitro, cell based | (26;27)           |
|            |                                  | Il-2             |                           | Degradation         | In vitro             | (24)              |
|            |                                  | Il-6             |                           | Degradation         | Ex vivo              | (18)              |
| <b>CG</b>  | Pro-inflammatory                 | CXCL5            | AAVL↓R <sub>9</sub> ELR   | Truncation          | In vitro             | (2;28)            |
|            |                                  | CXCL7            | SDLY↓A <sub>59</sub> ELR  | Truncation          | In vitro, cell based | (2;29;30)         |
|            |                                  | CCL15            | SFHF↓A <sub>29</sub> ADCC | Truncation          | Ex vivo              | (2;19)            |
|            |                                  | CCL23            | LDRF↓H <sub>27</sub> ATS  | Truncation          | Ex vivo              | (2;19)            |
|            |                                  | Chemerin         | QFAF↓S <sub>157</sub> KAL | Activation          | In vitro, cell based | (6;20;21)         |
|            | Anti-inflammatory                | CCL3(L1)         |                           | Degradation         | In vitro, cell based | (16)              |
|            |                                  | CAP18            |                           | Degradation         | In vitro             | (4)               |
|            |                                  | Il-6             | QSGF↓N <sub>107</sub> EET | Inactivation        | Ex vivo              | (18)              |
|            |                                  | TNFα             |                           | Degradation         | In vitro, cell based | (26;27)           |

## Reference List

1. Padrines,M., Wolf,M., Walz,A., and Baggiolini,M. 1994. Interleukin-8 processing by neutrophil elastase, cathepsin G and proteinase-3. *FEBS Lett.* 352:231-235.
2. Mortier,A., Van Damme,J., and Proost,P. 2008. Regulation of chemokine activity by posttranslational modification. *Pharmacol.Ther.* 120:197-217.
3. Vong,L., D'Acquisto,F., Pederzoli-Ribeil,M., Lavagno,L., Flower,R.J., Witko-Sarsat,V., and Perretti,M. 2007. Annexin 1 cleavage in activated neutrophils: a pivotal role for proteinase 3. *J.Biol.Chem.* 282:29998-30004.
4. Sorensen,O.E., Follin,P., Johnsen,A.H., Calafat,J., Tjabringa,G.S., Hiemstra,P.S., and Borregaard,N. 2001. Human cathelicidin, hCAP-18, is processed to the antimicrobial peptide LL-37 by extracellular cleavage with proteinase 3. *Blood* 97:3951-3959.
5. de Haar,S.F., Hiemstra,P.S., van Steenberg,M. T., Everts,V., and Beertsen,W. 2006. Role of polymorphonuclear leukocyte-derived serine proteinases in defense against *Actinobacillus actinomycetemcomitans*. *Infect.Immun.* 74:5284-5291.
6. Zabel,B.A., Zuniga,L., Ohyama,T., Allen,S.J., Cichy,J., Handel,T.M., and Butcher,E.C. 2006. Chemoattractants, extracellular proteases, and the integrated host defense response. *Exp.Hematol.* 34:1021-1032.
7. Coeshott,C., Ohnemus,C., Pilyavskaya,A., Ross,S., Wieczorek,M., Kroona,H., Leimer,A.H., and Cheronis,J. 1999. Converting enzyme-independent release of tumor necrosis factor alpha and IL-1beta from a stimulated human monocytic cell line in the presence of activated neutrophils or purified proteinase 3. *Proc.Natl.Acad.Sci.U.S.A* 96:6261-6266.
8. Sugawara,S., Uehara,A., Nochi,T., Yamaguchi,T., Ueda,H., Sugiyama,A., Hanzawa,K., Kumagai,K., Okamura,H., and Takada,H. 2001. Neutrophil proteinase 3-mediated induction of bioactive IL-18 secretion by human oral epithelial cells. *J.Immunol.* 167:6568-6575.
9. Choi,J.D., Bae,S.Y., Hong,J.W., Azam,T., Dinarello,C.A., Her,E., Choi,W.S., Kim,B.K., Lee,C.K., Yoon,D.Y. *et al.* 2009. Identification of the most active interleukin-32 isoform. *Immunology* 126:535-542.
10. Novick,D., Rubinstein,M., Azam,T., Rabinkov,A., Dinarello,C.A., and Kim,S.H. 2006. Proteinase 3 is an IL-32 binding protein. *Proc.Natl.Acad.Sci.U.S.A* 103:3316-3321.
11. Kim,S., Lee,S., Her,E., Bae,S., Choi,J., Hong,J., Jaekal,J., Yoon,D., Azam,T., Dinarello,C.A. *et al.* 2008. Proteinase 3-processed form of the recombinant IL-32 separate domain. *BMB.Rep.* 41:814-819.
12. Robache-Gallea,S., Morand,V., Bruneau,J.M., Schoot,B., Tagat,E., Realo,E., Chouaib,S., and Roman-Roman,S. 1995. In vitro processing of human tumor necrosis factor-alpha. *J.Biol.Chem.* 270:23688-23692.

13. Bank,U. and Ansorge,S. 2001. More than destructive: neutrophil-derived serine proteases in cytokine bioactivity control. *J.Leukoc.Biol.* 69:197-206.
14. Armstrong,L., Godinho,S.I., Uppington,K.M., Whittington,H.A., and Millar,A.B. 2006. Contribution of TNF-alpha converting enzyme and proteinase-3 to TNF-alpha processing in human alveolar macrophages. *Am.J.Respir.Cell Mol.Biol.* 34:219-225.
15. Armstrong,L., Godinho,S.I., Uppington,K.M., Whittington,H.A., and Millar,A.B. 2009. Tumour necrosis factor-alpha processing in interstitial lung disease: a potential role for exogenous proteinase-3. *Clin.Exp.Immunol.* 156:336-343.
16. Ryu,O.H., Choi,S.J., Firatli,E., Choi,S.W., Hart,P.S., Shen,R.F., Wang,G., Wu,W.W., and Hart,T.C. 2005. Proteolysis of macrophage inflammatory protein-1alpha isoforms LD78beta and LD78alpha by neutrophil-derived serine proteases. *J.Biol.Chem.* 280:17415-17421.
17. Guillabert,A., Wittamer,V., Bondue,B., Godot,V., Imbault,V., Parmentier,M., and Communi,D. 2008. Role of neutrophil proteinase 3 and mast cell chymase in chemerin proteolytic regulation. *J.Leukoc.Biol.* 84:1530-1538.
18. Bank,U., Kupper,B., Reinhold,D., Hoffmann,T., and Ansorge,S. 1999. Evidence for a crucial role of neutrophil-derived serine proteases in the inactivation of interleukin-6 at sites of inflammation. *FEBS Lett.* 461:235-240.
19. Berahovich,R.D., Miao,Z., Wang,Y., Premack,B., Howard,M.C., and Schall,T.J. 2005. Proteolytic activation of alternative CCR1 ligands in inflammation. *J.Immunol.* 174:7341-7351.
20. Wittamer,V., Bondue,B., Guillabert,A., Vassart,G., Parmentier,M., and Communi,D. 2005. Neutrophil-mediated maturation of chemerin: a link between innate and adaptive immunity. *J.Immunol.* 175:487-493.
21. Zabel,B.A., Allen,S.J., Kulig,P., Allen,J.A., Cichy,J., Handel,T.M., and Butcher,E.C. 2005. Chemerin activation by serine proteases of the coagulation, fibrinolytic, and inflammatory cascades. *J.Biol.Chem.* 280:34661-34666.
22. Zhu,J., Nathan,C., Jin,W., Sim,D., Ashcroft,G.S., Wahl,S.M., Lacomis,L., Erdjument-Bromage,H., Tempst,P., Wright,C.D. *et al.* 2002. Conversion of proepithelin to epithelins: roles of SLPI and elastase in host defense and wound repair. *Cell* 111:867-878.
23. Cohen,A.B., Stevens,M.D., Miller,E.J., Atkinson,M.A., and Mullenbach,G. 1992. Generation of the neutrophil-activating peptide-2 by cathepsin G and cathepsin G-treated human platelets. *Am.J.Physiol* 263:L249-L256.
24. Leavell,K.J., Peterson,M.W., and Gross,T.J. 1997. Human neutrophil elastase abolishes interleukin-8 chemotactic activity. *J.Leukoc.Biol.* 61:361-366.
25. Padrines, M., et al., *Interleukin-8 processing by neutrophil elastase, cathepsin G and proteinase-3.* FEBS Lett, 1994. 352(2): p. 231-5.
26. Scuderi,P., Nez,P.A., Duerr,M.L., Wong,B.J., and Valdez,C.M. 1991. Cathepsin-G and leukocyte elastase inactivate human tumor necrosis factor and lymphotoxin. *Cell Immunol.* 135:299-313.

27. van Kessel,K.P., van Strijp,J.A., and Verhoef,J. 1991. Inactivation of recombinant human tumor necrosis factor-alpha by proteolytic enzymes released from stimulated human neutrophils. *J.Immunol.* 147:3862-3868.
28. Nufer,O., Corbett,M., and Walz,A. 1999. Amino-terminal processing of chemokine ENA-78 regulates biological activity. *Biochemistry* 38:636-642.
29. Brandt,E., Van Damme,J., and Flad,H.D. 1991. Neutrophils can generate their activator neutrophil-activating peptide 2 by proteolytic cleavage of platelet-derived connective tissue-activating peptide III. *Cytokine* 3:311-321.
30. Ehlert,J.E., Ludwig,A., Grimm,T.A., Lindner,B., Flad,H.D., and Brandt,E. 2000. Down-regulation of neutrophil functions by the ELR(+) CXC chemokine platelet basic protein. *Blood* 96:2965-2972.
